# Supplementary material
Source: Research Square preprint supplement (doi:10.21203/rs.3.rs-9506061/v1)
Supplement: Supplementary file 1 [file 287dbf0f166986866aa4dc08.pdf]

|                   | <b>Age 1</b> | <b>Age 2</b> | <b>Age 3</b> | <b>Height 1</b> | <b>Height 2</b> | <b>Height 3</b> | <b>Weight 1</b> | <b>Weight 2</b> | <b>Weight 3</b> | <b>BMI 1</b> | <b>BMI 2</b> | <b>BMI 3</b> | <b>CS_1</b> | <b>CS_2</b> | <b>CS_3</b> |
|-------------------|--------------|--------------|--------------|-----------------|-----------------|-----------------|-----------------|-----------------|-----------------|--------------|--------------|--------------|-------------|-------------|-------------|
| <i>Mean</i>       | 10.2         | 11.2         | 12.2         | 143.8           | 151.0           | 158.4           | 36.9            | 41.7            | 49.6            | 17.6         | 18.1         | 19.5         | 1,949.3     | 1,986.6     | 2,048.5     |
| <i>Stand. dev</i> | 2.0          | 2.0          | 2.0          | 9.9             | 10.3            | 11.0            | 8.0             | 9.4             | 11.8            | 2.2          | 2.4          | 2.9          | 72.6        | 71.7        | 86.6        |
| <i>Median</i>     | 10.1         | 11.1         | 11.9         | 143.0           | 151.0           | 156.5           | 35.5            | 40.1            | 48.8            | 17.2         | 17.7         | 18.7         | 1,939.0     | 1,979.0     | 2,037.1     |
| <i>25 prcntil</i> | 8.6          | 9.6          | 10.6         | 137.3           | 144.3           | 150.6           | 31.2            | 36.1            | 41.2            | 16.2         | 16.2         | 17.3         | 1,905.0     | 1,948.0     | 1,991.0     |
| <i>75 prcntil</i> | 12.0         | 13.0         | 14.0         | 151.0           | 157.0           | 165.8           | 41.4            | 48.5            | 56.7            | 18.7         | 19.6         | 21.2         | 1,983.0     | 2,026.0     | 2,081.0     |
| <i>Min</i>        | 6.5          | 7.5          | 8.5          | 126.0           | 133.0           | 136.0           | 23.6            | 26.8            | 28.2            | 14.2         | 14.3         | 14.8         | 1,787.2     | 1,822.1     | 1,882.5     |
| <i>Max</i>        | 13.7         | 14.7         | 15.7         | 169.5           | 180.0           | 182.0           | 59.2            | 69.6            | 84.3            | 24.1         | 25.6         | 27.2         | 2,123.2     | 2,157.6     | 2,263.0     |
| <i>Mean</i>       | 9.5          | 10.5         | 11.5         | 138.9           | 145.4           | 152.0           | 33.7            | 38.3            | 43.4            | 17.1         | 17.7         | 18.4         | 1,872.4     | 1,906.2     | 1,951.2     |
| <i>Stand. dev</i> | 1.7          | 1.7          | 1.7          | 11.7            | 11.9            | 11.8            | 10.4            | 12.5            | 14.1            | 2.7          | 3.2          | 3.6          | 97.8        | 96.9        | 99.5        |
| <i>Median</i>     | 9.1          | 10.1         | 11.1         | 140.0           | 147.0           | 155.0           | 33.1            | 37.6            | 45.0            | 16.5         | 16.7         | 17.9         | 1,865.5     | 1,913.2     | 1,952.5     |
| <i>25 prcntil</i> | 8.1          | 9.1          | 10.1         | 128.5           | 134.5           | 141.3           | 25.4            | 28.1            | 31.1            | 15.0         | 15.4         | 15.7         | 1,812.0     | 1,827.0     | 1,869.0     |
| <i>75 prcntil</i> | 10.8         | 11.8         | 12.8         | 146.5           | 154.0           | 162.3           | 38.6            | 45.6            | 50.0            | 18.2         | 19.3         | 20.5         | 1,938.0     | 1,979.0     | 2,018.0     |
| <i>Min</i>        | 6.4          | 7.4          | 8.4          | 114.0           | 121.0           | 125.0           | 18.6            | 19.9            | 22.1            | 13.4         | 13.4         | 12.9         | 1,670.6     | 1,728.1     | 1,780.8     |
| <i>Max</i>        | 12.8         | 13.7         | 14.8         | 165.0           | 170.0           | 175.0           | 72.7            | 89.9            | 95.0            | 26.7         | 31.1         | 31.0         | 2,133.7     | 2,154.5     | 2,186.9     |
| <i>Mean</i>       | 9.8          | 10.8         | 11.8         | 141.3           | 148.1           | 155.2           | 35.3            | 40.0            | 46.5            | 17.3         | 17.9         | 18.9         | 1,9105      | 1,946.0     | 1,999.4     |
| <i>Stand. dev</i> | 1.9          | 1.9          | 1.9          | 11.0            | 11.4            | 11.8            | 9.4             | 11.2            | 13.3            | 2.5          | 2.8          | 3.3          | 94.1        | 94.1        | 105.0       |
| <i>Median</i>     | 9.7          | 10.7         | 11.7         | 141.0           | 148.0           | 155.5           | 34.0            | 38.4            | 46.4            | 17.0         | 17.4         | 18.3         | 1,913.7     | 1,959.8     | 2,001.1     |
| <i>25 prcntil</i> | 8.4          | 9.4          | 10.4         | 133.0           | 139.0           | 145.8           | 28.2            | 31.1            | 36.2            | 15.5         | 15.9         | 16.6         | 1,850.1     | 1,881.5     | 1,932.7     |
| <i>75 prcntil</i> | 11.6         | 12.6         | 13.6         | 150.0           | 155.5           | 164.0           | 39.9            | 45.9            | 53.5            | 18.4         | 19.6         | 20.9         | 1,968.0     | 1,996.8     | 2,060.1     |
| <i>Min</i>        | 6.4          | 7.4          | 8.4          | 114.0           | 121.0           | 125.0           | 18.6            | 19.9            | 22.1            | 13.4         | 13.4         | 12.9         | 1,670.6     | 1,728.1     | 1,780.8     |
| <i>Max</i>        | 13.7         | 14.7         | 15.7         | 169.5           | 180.0           | 182.0           | 72.7            | 89.9            | 95.0            | 26.7         | 31.1         | 31.0         | 2,133.7     | 2,157.6     | 2,263.0     |

|                              |                   | <b>Height 2 -<br/>Height 1</b> | <b>Height 3 -<br/>Height 2</b> | <b>Weight 2 -<br/>Weight 1</b> | <b>Weight 3 -<br/>Weight 2</b> | <b>BMI 2 - BMI<br/>1</b> | <b>BMI 3 - BMI<br/>2</b> | <b>CS 2 - CS1</b> | <b>CS3 - CS2</b> |
|------------------------------|-------------------|--------------------------------|--------------------------------|--------------------------------|--------------------------------|--------------------------|--------------------------|-------------------|------------------|
| <i>boys</i>                  | <i>Mean</i>       | 7.2                            | 7.5                            | 4.9                            | 7.9                            | 0.5                      | 1.4                      | 37.3              | 61.9             |
|                              | <i>Stand. dev</i> | 1.9                            | 2.7                            | 2.3                            | 3.8                            | 0.8                      | 1.3                      | 21.0              | 28.8             |
|                              | <i>Median</i>     | 7.0                            | 7.5                            | 4.6                            | 7.7                            | 0.5                      | 1.3                      | 37.7              | 63.5             |
|                              | <i>25 prcntil</i> | 6.0                            | 6.0                            | 3.1                            | 5.4                            | -0.2                     | 0.7                      | 22.1              | 42.1             |
|                              | <i>75 prcntil</i> | 8.0                            | 9.0                            | 6.6                            | 10.2                           | 1.1                      | 1.9                      | 51.1              | 78.8             |
|                              | <i>Min</i>        | 3.0                            | 0.0                            | -0.1                           | -0.1                           | -1.5                     | -0.8                     | -21.6             | 7.8              |
|                              | <i>Max</i>        | 13.0                           | 13.0                           | 10.4                           | 20.3                           | 2.4                      | 7.3                      | 85.7              | 124.4            |
| <i>girls</i>                 | <i>Mean</i>       | 6.5                            | 6.7                            | 4.6                            | 5.2                            | 0.6                      | 0.7                      | 33.8              | 45.1             |
|                              | <i>Stand. dev</i> | 1.8                            | 2.7                            | 3.3                            | 4.8                            | 1.2                      | 1.8                      | 24.9              | 24.5             |
|                              | <i>Median</i>     | 7.0                            | 7.0                            | 3.4                            | 4.4                            | 0.5                      | 0.6                      | 29.9              | 39.9             |
|                              | <i>25 prcntil</i> | 5.5                            | 5.3                            | 2.6                            | 2.7                            | -0.1                     | 0.0                      | 20.5              | 26.9             |
|                              | <i>75 prcntil</i> | 8.0                            | 8.5                            | 5.9                            | 7.6                            | 1.0                      | 1.6                      | 47.9              | 59.2             |
|                              | <i>Min</i>        | 2.0                            | 1.0                            | 0.7                            | -14.9                          | -1.3                     | -8.0                     | -14.3             | -4.9             |
|                              | <i>Max</i>        | 9.5                            | 12.5                           | 17.2                           | 16.6                           | 5.2                      | 5.5                      | 105.2             | 115.7            |
| <i>boys and girls pooled</i> | <i>Mean</i>       | 6.8                            | 7.1                            | 4.7                            | 6.5                            | 0.5                      | 1.1                      | 35.6              | 53.4             |
|                              | <i>Stand. dev</i> | 1.9                            | 2.7                            | 2.8                            | 4.5                            | 1.0                      | 1.6                      | 23.1              | 27.9             |
|                              | <i>Median</i>     | 7.0                            | 7.0                            | 3.8                            | 6.1                            | 0.5                      | 1.0                      | 35.1              | 51.4             |
|                              | <i>25 prcntil</i> | 6.0                            | 5.8                            | 2.7                            | 3.6                            | -0.1                     | 0.3                      | 21.0              | 32.4             |
|                              | <i>75 prcntil</i> | 8.0                            | 9.0                            | 6.3                            | 9.5                            | 1.0                      | 1.8                      | 49.6              | 71.6             |
|                              | <i>Min</i>        | 2.0                            | 0.0                            | -0.1                           | -14.9                          | -1.5                     | -8.0                     | -21.6             | -4.9             |
|                              | <i>Max</i>        | 13.0                           | 13.0                           | 17.2                           | 20.3                           | 5.2                      | 7.3                      | 105.2             | 124.4            |
